# Supplementary material for: Facile solution combustion synthesis of MoO2 nanoparticles as efficient photocatalysts
Source: Royal Society of Chemistry journal article supplement (doi:10.1039/c7ce01611e), 2017-01-01
Supplement: c7ce01611e1.pdf [file c7ce01611e1.pdf]

## Supporting Information:

### Facile Solution Combustion Synthesis of MoO<sub>2</sub> Nanoparticles as Efficient Photocatalysts

Siyong Gu,<sup>\*a,b</sup> Mingli Qin,<sup>\*a</sup> Houan Zhang,<sup>b</sup> Jidong Ma,<sup>b</sup> Haoyang Wu,<sup>a</sup> Xuanhui Qu<sup>a</sup>

Institute for Advanced Materials and Technology, University of Science and Technology  
Beijing, Beijing 100083, P. R. China.

<sup>b</sup> Fujian Provincial Key Laboratory of Functional Materials and Applications, Xiamen  
University of Technology, Xiamen 361024, P. R. China

**\*Corresponding author** E-mail address: gu-siyong@163.com (Siyong Gu),

qinml@mater.ustb.edu.cn (Mingli Qin)

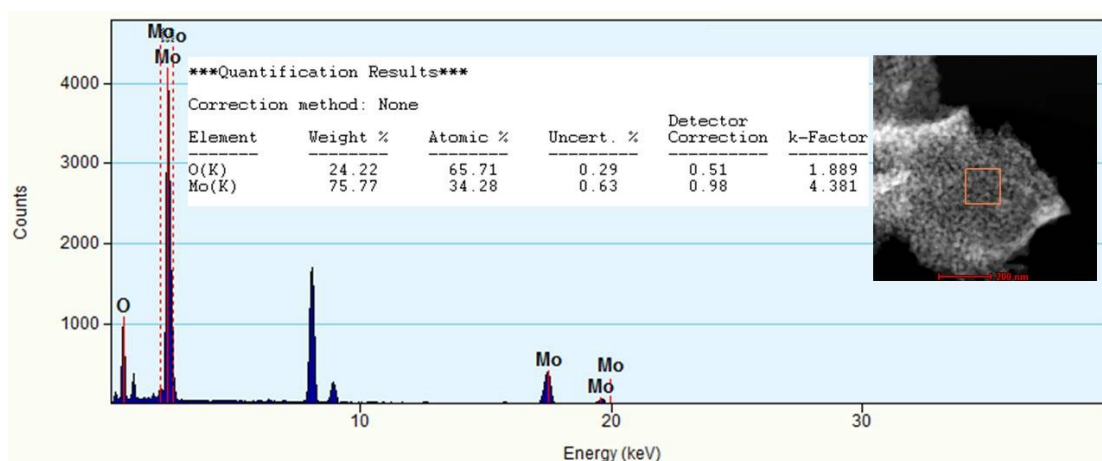

Fig.S1 EDX spectrum image EDX spectrum image of foam-like MoO<sub>2</sub>

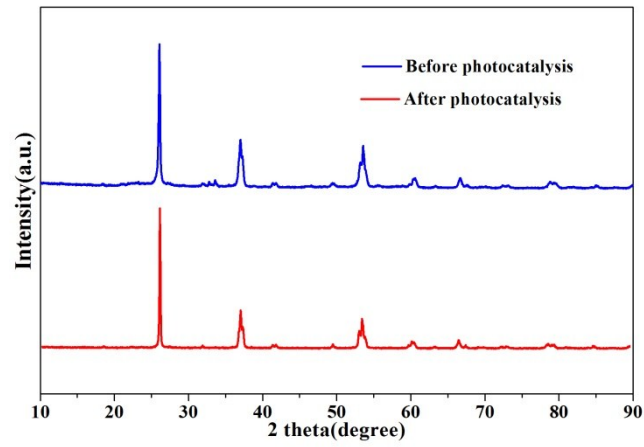

Fig.S2 XRD spectra of foam-like MoO<sub>2</sub> before photocatalysis and after photocatalysis.

Table S1 Time-resolved lifetime of foam-like MoO<sub>2</sub>

| $T_1(ns)$ | $T_2(ns)$ |
|-----------|-----------|
| 1.209     | 16.402    |
